# Supplementary material for: The Relationship of Hedonic Hunger, Macronutrient Balance, Nutrition Knowledge, and Body Image and Weight Control with Dietary Intake in Student Athletes and Exercisers
Source: MDPI journal article supplement (doi:10.3390/nu16060772), 2024-03-08
Supplement: s1 [file s1]

Supplementary Material

Table S1: Spearman's Crosstabulation results for main outcomes (n=42)

|            | WC CDRS | PFS FT | BIDQ    | MJDF   | Cvsl CDRS | OAvsl CDRS | PFS Total | PFS FA | PFS FP  | %TNK   | %GNK   | %SNK   | ARFS   | Fat/kg/bw | CHO/kg/bw | PRO/kg/bw | PRO% of E | CHO% of E | Fats% of E |   |
|------------|---------|--------|---------|--------|-----------|------------|-----------|--------|---------|--------|--------|--------|--------|-----------|-----------|-----------|-----------|-----------|------------|---|
| WC CDRS    | 1       |        |         |        |           |            |           |        |         |        |        |        |        |           |           |           |           |           |            |   |
| PFS FT     | -0.120  | 1      |         |        |           |            |           |        |         |        |        |        |        |           |           |           |           |           |            |   |
|            | 0.450   |        |         |        |           |            |           |        |         |        |        |        |        |           |           |           |           |           |            |   |
| BIDQ       | -0.042  | 0.206  | 1       |        |           |            |           |        |         |        |        |        |        |           |           |           |           |           |            |   |
|            | 0.793   | 0.191  |         |        |           |            |           |        |         |        |        |        |        |           |           |           |           |           |            |   |
| MJDF       | .387*   | -.353* | -.340*  | 1      |           |            |           |        |         |        |        |        |        |           |           |           |           |           |            |   |
|            | 0.011   | 0.022  | 0.028   |        |           |            |           |        |         |        |        |        |        |           |           |           |           |           |            |   |
| Cvsl CDRS  | -0.140  | -0.112 | -.441** | -0.124 | 1         |            |           |        |         |        |        |        |        |           |           |           |           |           |            |   |
|            | 0.376   | 0.478  | 0.003   | 0.434  |           |            |           |        |         |        |        |        |        |           |           |           |           |           |            |   |
| OAvsl CDRS | 0.007   | .359*  | -0.096  | -0.069 | 0.105     | 1          |           |        |         |        |        |        |        |           |           |           |           |           |            |   |
|            | 0.965   | 0.020  | 0.546   | 0.663  | 0.510     |            |           |        |         |        |        |        |        |           |           |           |           |           |            |   |
| PFS Total  | 0.020   | .743** | .388*   | -0.185 | -0.278    | 0.245      | 1         |        |         |        |        |        |        |           |           |           |           |           |            |   |
|            | 0.900   | 0.000  | 0.011   | 0.241  | 0.075     | 0.118      |           |        |         |        |        |        |        |           |           |           |           |           |            |   |
| PFS FA     | 0.090   | .527** | .428**  | -0.093 | -0.239    | 0.291      | .864**    | 1      |         |        |        |        |        |           |           |           |           |           |            |   |
|            | 0.570   | 0.000  | 0.005   | 0.558  | 0.128     | 0.061      | 0.000     |        |         |        |        |        |        |           |           |           |           |           |            |   |
| PFS FP     | -0.111  | .512** | 0.301   | -0.182 | -.350*    | 0.062      | .809**    | .507** | 1       |        |        |        |        |           |           |           |           |           |            |   |
|            | 0.483   | 0.001  | 0.052   | 0.248  | 0.023     | 0.696      | 0.000     | 0.001  |         |        |        |        |        |           |           |           |           |           |            |   |
| %TNK       | -0.276  | -0.115 | -0.105  | -0.131 | 0.222     | -0.103     | -0.301    | -0.150 | -.422** | 1      |        |        |        |           |           |           |           |           |            |   |
|            | 0.077   | 0.467  | 0.507   | 0.408  | 0.157     | 0.515      | 0.053     | 0.343  | 0.005   |        |        |        |        |           |           |           |           |           |            |   |
| %GNK       | 0.004   | -0.163 | 0.012   | -0.061 | -0.079    | -0.271     | -0.118    | -0.034 | -0.175  | .581** | 1      |        |        |           |           |           |           |           |            |   |
|            | 0.980   | 0.301  | 0.940   | 0.703  | 0.620     | 0.082      | 0.456     | 0.832  | 0.269   | 0.000  |        |        |        |           |           |           |           |           |            |   |
| %SNK       | -.326*  | -0.050 | -0.082  | -0.146 | 0.287     | -0.020     | -0.293    | -0.150 | -.415** | .900** | 0.194  | 1      |        |           |           |           |           |           |            |   |
|            | 0.035   | 0.751  | 0.607   | 0.356  | 0.066     | 0.901      | 0.060     | 0.342  | 0.006   | 0.000  | 0.219  |        |        |           |           |           |           |           |            |   |
| ARFS       | 0.179   | -0.173 | -0.026  | 0.191  | -0.011    | 0.014      | -0.240    | -0.155 | -.309*  | 0.240  | 0.208  | 0.195  | 1      |           |           |           |           |           |            |   |
|            | 0.258   | 0.274  | 0.871   | 0.226  | 0.943     | 0.931      | 0.126     | 0.327  | 0.046   | 0.126  | 0.185  | 0.215  |        |           |           |           |           |           |            |   |
| Fat/kg/bw  | 0.192   | -0.107 | -0.303  | .778** | -0.030    | 0.148      | -0.030    | -0.024 | -0.046  | -0.156 | -0.158 | -0.133 | 0.145  | 1         |           |           |           |           |            |   |
|            | 0.224   | 0.499  | 0.051   | 0.000  | 0.851     | 0.350      | 0.853     | 0.882  | 0.772   | 0.324  | 0.317  | 0.400  | 0.361  |           |           |           |           |           |            |   |
| CHO/kg/bw  | 0.147   | -0.198 | -0.128  | .629** | -0.025    | 0.006      | -0.181    | -0.123 | -0.232  | 0.052  | -0.023 | 0.052  | 0.256  | .512**    | 1         |           |           |           |            |   |
|            | 0.352   | 0.208  | 0.418   | 0.000  | 0.874     | 0.971      | 0.252     | 0.437  | 0.139   | 0.743  | 0.883  | 0.745  | 0.101  | 0.001     |           |           |           |           |            |   |
| PRO/kg/bw  | 0.234   | -0.119 | -0.220  | .708** | -0.049    | 0.180      | -0.054    | 0.013  | -0.081  | -0.066 | -0.204 | -0.007 | 0.205  | .811**    | .449**    | 1         |           |           |            |   |
|            | 0.136   | 0.455  | 0.162   | 0.000  | 0.757     | 0.254      | 0.732     | 0.935  | 0.608   | 0.677  | 0.196  | 0.965  | 0.192  | 0.000     | 0.003     |           |           |           |            |   |
| PRO% of E  | 0.031   | 0.034  | -0.108  | 0.059  | 0.010     | 0.076      | 0.037     | 0.094  | 0.062   | -0.044 | -0.142 | 0.005  | -0.054 | 0.190     | -.408**   | .539**    | 1         |           |            |   |
|            | 0.845   | 0.829  | 0.495   | 0.712  | 0.952     | 0.632      | 0.818     | 0.555  | 0.695   | 0.783  | 0.371  | 0.977  | 0.732  | 0.227     | 0.007     | 0.000     |           |           |            |   |
|            | -0.075  | 0.000  | 0.128   | -0.065 | 0.027     | -0.120     | -0.082    | -0.069 | -0.139  | 0.193  | 0.093  | 0.178  | 0.013  | -0.300    | .565**    | -.306*    | -.733**   |           |            | 1 |

|            |       |       |        |       |        |       |       |       |       |        |        |        |        |        |         |       |        |         |   |
|------------|-------|-------|--------|-------|--------|-------|-------|-------|-------|--------|--------|--------|--------|--------|---------|-------|--------|---------|---|
| CHO% of E  | 0.635 | 1.000 | 0.420  | 0.684 | 0.863  | 0.449 | 0.607 | 0.665 | 0.380 | 0.220  | 0.559  | 0.260  | 0.933  | 0.053  | 0.000   | 0.049 | 0.000  |         |   |
| Fats% of E | 0.050 | 0.053 | -0.167 | 0.145 | -0.018 | 0.161 | 0.141 | 0.083 | 0.216 | -0.297 | -0.142 | -0.291 | -0.170 | .453** | -.430** | 0.238 | .501** | -.878** | 1 |
|            | 0.751 | 0.738 | 0.290  | 0.359 | 0.911  | 0.307 | 0.374 | 0.600 | 0.169 | 0.056  | 0.370  | 0.062  | 0.283  | 0.003  | 0.004   | 0.129 | 0.001  | 0.000   |   |

Note. WC CDRS, Weight Change Contour Drawing Rating Scale score. PFS FT, Power of Food Scale Food Tasted Subscale score. BIDQ, Body Image Disturbance Questionnaire score. MJDF, Megajoules of energy intake with dietary fibre. CvsI CDRS, Current versus Ideal Contour Drawing Rating Scale score. OAvsI CDRS, Opposite Average versus Ideal Contour Drawing Rating Scale score. PFS Total, Power of Food Scale Total score. PFS FA, Power of Food Scale Food Available Subscale score. PFS FP, Power of Food Scale Food Present Subscale score. %TNK, Percent score of Total Nutrition Knowledge. %GNK, Percent score of General Nutrition Knowledge. %SNK, Percent score of Sport Nutrition Knowledge. ARFS, Australian Recommended Food Score. Fat/kg/bw, Fat intake grams per kilogram of body weight. CHO/kg/bw, Carbohydrate intake grams per kilogram of body weight. PRO/kg/bw, Protein intake grams per kilogram of body weight. PRO% of E, Protein percentage of total energy intake. CHO% of E, Carbohydrate percentage of total energy intake. Fats% of E, Fat percentage of total energy intake. \*, p<0.05. \*\*, p<0.01.

**Table S2.** Differences in outcome measure based on gender (n=82).

|                                                      | Male Scores  | Female Scores | Test result                           |
|------------------------------------------------------|--------------|---------------|---------------------------------------|
| Energy intake with dietary fibre (n=42)<br>Mean rank | 29.0         | 19.45         | U=81.0, z=-2.069, p=0.038 (exact sig) |
| Current vs. Ideal CDRS score<br>Median (IQR)         | 0(1)         | -1(2)         | U = 629.5, z = -2.818, p=0.005        |
| BIDQ<br>Median (IQR)                                 | 1.43(0.79)   | 2.14(1.36)    | U=1198.5, z=3.071, p=0.002            |
| PFS<br>Mean                                          | 2.33 (0.7)   | 3.03(0.76)    | t (93) = -4.177, p <0.0001            |
| PFS Food Available<br>Median (IQR)                   | 1.833 (1.67) | 3.0(1.33)     | U=1293.0, z=2.904, p=0.004            |
| PFS Food Present<br>Mean rank                        | 34.43        | 53.67         | U=1318.0, z=3.113, p=0.002            |
| PFS Food Tasted<br>Mean rank                         | 31.0         | 55.1          | U=1414.0, z=3.903, p<0.0001           |

Note. CDRS, Contour Drawing Rating Scale. BIDQ, Body Image Disturbance Questionnaire score. PFS, Power of Food Scale score. IQR, interquartile range.

**Table S3.** Differences in outcome measure based on prior nutrition education (n=82).

|                                                       | Prior nutrition education group scores | No prior nutrition education group scores | Test result                |
|-------------------------------------------------------|----------------------------------------|-------------------------------------------|----------------------------|
| %TNK<br>Mean rank                                     | 52.43                                  | 36.98                                     | U=512.0, z=-2.792, p=0.47  |
| %GNK<br>Mean rank                                     | 53.45                                  | 40.25                                     | U=641.5, z=-2.349, p=0.019 |
| %SNK<br>Mean rank                                     | 50.83                                  | 37.87                                     | U=560.0, z=-2.343, p=0.019 |
| Opposite average vs. Ideal CDRS score<br>Median (IQR) | 1(1)                                   | -1(1)                                     | U=1295.5, z=1.988, p=0.47  |

Note. %TNK, percentage of total nutrition knowledge questions correct. %GNK, percentage of general nutrition knowledge questions correct. %SNK, percentage of sport nutrition knowledge questions correct. CDRS, Contour Drawing Rating Scale. IQR, interquartile range.

**Table S4.** Differences in outcome measure based on supplement intake.

|                                                                    | Those who consume supplement group score | Those who do not consume supplements group score | Test result                   |
|--------------------------------------------------------------------|------------------------------------------|--------------------------------------------------|-------------------------------|
| ARFS extras consumption<br>(=42)<br>Mean rank                      | 26.63                                    | 18.65                                            | U=279.5, z=2.156,<br>p=0.031  |
| Opposite average vs. Ideal<br>CDRS score<br>(n=82)<br>Median (IQR) | 0.0 (1)                                  | -1.0 (1)                                         | U=1417.0, z=2.246,<br>p=0.025 |

Note. ARFS, Australian Recommended Food Score. CDRS, Contour Drawing Rating Scale. IQR, interquartile range.

**Table S5.** Differences in outcome measure based on consumption of a special diet (n=42).

|                                     | Those who consume a special diet group score | Those who do not consume a special diet group score | Test result                      |
|-------------------------------------|----------------------------------------------|-----------------------------------------------------|----------------------------------|
| ARFS meat consumption<br>Mean rank  | 14.0                                         | 26.6                                                | U=85.0, z=-3.378,<br>p=0.001     |
| ARFS meat alternatives<br>Mean rank | 30.38                                        | 15.46                                               | U=363.5, z=3.910,<br>p<0.0001    |
| fat/kg/bw<br>Mean (SD)              | 1.09 (0.29)                                  | 1.33(0.38)                                          | t(40)=2.211, p=0.33 <sup>b</sup> |
| PRO/kg/bw<br>Mean rank              | 15.71                                        | 25.44                                               | U=114.0, z=-2.524,<br>p=0.012    |
| PRO% of E<br>Mean rank              | 13.32                                        | 27.06                                               | U=73.5, z=-3.579,<br>p<0.0001    |
| Fat% of E<br>Mean (SD)              | 30.65 (4.17)                                 | 36.36(5.99)                                         | t(40)=3.405, p=0.002             |
| CHO% of E<br>Median (IQR)           | 56 (12)                                      | 47(10)                                              | U=331.0, z=3.044,<br>p=0.002     |

Note. ARFS, Australian Recommended Food Score. Fat/kg/bw, fat intake per kilogram of body weight. PRO/kg/bw, protein intake per kilogram of body weight. PRO% of E, protein percentage of total energy intake. Fat% of E, fat percentage of total energy intake. CHO% of E, carbohydrate percentage of total energy intake.
